# Supplementary material for: Interventions to reduce dependency in personal activities of daily living in community dwelling adults who use homecare services: a systematic review
Source: PubMed Central journal article supplement (PMC4607918; doi:10.1177/0269215514564894), 2015-11
Supplement: CRE564894.pdf [file CRE564894.pdf]

## Appendix 1: Search Strategy

1. home care services/
2. home health aides/
3. homemaker services/
4. homecare.tw.
5. (home\$ adj1 (care\$ or treat\$ or help\$)).tw.
6. (home\$ adj2 (service\$ or aid\$)).tw.
7. domiciliary.tw.
8. 1 or 2 or 3 or 4 or 5 or 6 or 7
9. activities of daily living/
10. self care/
11. independent living/
12. (function\$ adj1 (independ\$ or abilit\$)).tw.
13. (self adj1 care).tw.
14. (activit\$ adj2 daily).tw.
15. (restorat\$ adj2 (care\$ or model\$ or service\$ or home\$)).tw.
16. (re-able\$ or reable\$ or re-enablem\$ or enablem\$).tw.
17. goals/
18. (goal\$ adj2 (set\$ or treat\$ or therap\$)).tw.
19. 9 or 10 or 11 or 12 or 13 or 14 or 15 or 16 or 17 or 18
20. 8 and 19
21. randomized controlled trial.pt.
22. controlled clinical trial.pt.
23. (control\$ adj2 trial).tw.
24. intervention studies/
25. experiment\$.tw.
26. (time adj1 series).tw.
27. (pre test or pretest or posttest or post test).tw.
28. random allocation/
29. intervention?.tw.
30. evaluation studies/
31. comparative study.pt
32. 21 or 22 or 23 or 24 or 25 or 26 or 27 or 28 or 29 or 30 or 31
33. 21 and 32
34. nursing home/
35. 33 not 34
36. limit to adults

## Appendix 2: Systematic Review Secondary Outcomes

| Study                     | Death                                                                                                            | EADL                                                                                                                   | Admissions                                                                                                                                                  | Falls        | Mood                                                                                                                                                                | HrQoL<br>SCrQoL                                                                                                                                      |
|---------------------------|------------------------------------------------------------------------------------------------------------------|------------------------------------------------------------------------------------------------------------------------|-------------------------------------------------------------------------------------------------------------------------------------------------------------|--------------|---------------------------------------------------------------------------------------------------------------------------------------------------------------------|------------------------------------------------------------------------------------------------------------------------------------------------------|
| Feldman <sup>24</sup>     | I: 15%<br>(of 229)<br>C: 14%<br>(of 175)                                                                         | Change scores only – no difference between groups                                                                      | Not Reported                                                                                                                                                | Not Reported | CES-D<br>No data – but reported no differences between groups                                                                                                       | Not Reported                                                                                                                                         |
| Glendinning <sup>25</sup> | I: 11%<br>(74/654)<br>C: 12%<br>(44/361)                                                                         | Not Reported                                                                                                           | Not Reported                                                                                                                                                | Not Reported | Not Reported                                                                                                                                                        | Significant improvement in EQ5D score in re-ablement group (P<0.001). No change in control group.<br><br>No significant differences in ASCOT scores. |
| Gottlieb <sup>26</sup>    | Not Reported                                                                                                     | Change scores – no differences between groups                                                                          | Not Reported                                                                                                                                                | Not Reported | Not Reported                                                                                                                                                        | Not Reported                                                                                                                                         |
| King <sup>27</sup>        | <b>4M</b><br>I: 2%<br>(2/93)<br>C: 0%<br>(0/93)<br><br><b>7M</b><br>I: 3%<br>(3/93)<br>C: 2%<br>(2/93)           | <b>NEADL - 4M</b><br>I: 44.3 (0.9)<br>C: 45.0 (1.0)<br><br><b>NEADL- 7M</b><br>I: 44.2 (1.0)<br>C: 44.4 (1.1)          | <b>Residential</b><br><br><b>4M</b><br>I: 3% (3/93)<br>C: 2% (2/93)<br><br><b>7M</b><br>I: 4% (4/93)<br>C: 2% (2/93)                                        | Not Reported | Not Reported                                                                                                                                                        | SF-36 (overall)<br>Between arm difference in change 3.8 (0.0, 7.7) P= 0.05.                                                                          |
| Lewin <sup>28</sup>       | <b>3M</b><br>I: 4%<br>(4/100)<br>C: 4%<br>(4/100)<br><br><b>12M</b><br>I: 11%<br>(11/100)<br>C: 11%<br>(11/100)  | <b>PAF – IADL</b><br><br><b>3M</b><br>I: 14.8(3.7)<br>C: 14.9(4.1)<br><br><b>12M</b><br>I: 14.0 (2.8)<br>C: 14.5 (3.9) | <b>Residential</b><br><br><b>3M</b><br>I: 1%(1/100)<br>C: 2%(2/100)<br><br><b>12M</b><br>I: 2% (2/100)<br>C: 4% (4/100)                                     | Not Reported | PGMS<br><br><b>3M</b><br>I: 10.4 (3.6)<br>C: 11.0 (3.7)<br><br><b>12M</b><br>I: 10.8 (3.4)<br>C: 10.9 (3.6)<br><br>Significant difference in change (2.04, P=0.041) | Not Reported                                                                                                                                         |
| Lewin <sup>29</sup>       | <b>3M</b><br>I: 5%<br>(17/375)<br>C: 7%<br>(25/375)<br><br><b>6M</b><br>I: 17%<br>(65/375)<br>C: 19%<br>(72/375) | Obtained from authors<br><br>No difference between groups                                                              | <b>Hospital/ Residential/ Hospice</b><br><br><b>3M</b><br>I: 13%<br>(49/375)<br>C: 7% (27/375)<br><br><b>6M</b><br>I: 13%<br>(49/375)<br>C: 14%<br>(52/375) | Not Reported | Not Reported                                                                                                                                                        | Collected but not presented in paper. No differences reported.                                                                                       |

| Study                     | Death                                    | EADL                                                 | Admissions                                                                     | Falls        | Mood                                                                                             | HrQoL<br>SCrQoL                                                                                                                     |
|---------------------------|------------------------------------------|------------------------------------------------------|--------------------------------------------------------------------------------|--------------|--------------------------------------------------------------------------------------------------|-------------------------------------------------------------------------------------------------------------------------------------|
| Marek <sup>30</sup>       | I: 11% (6/55)<br>C: 7% (2/30)            | Not Reported                                         | <b>Nursing Home</b><br>I: 4% (2/55)<br>C: 23% (7/30)                           | Not Reported | Mood indicators<br>– Minimum<br>dataset<br><br>I: 0.3 (0.6)<br>C: 0.7 (1.5)<br><br>No difference | Not Reported                                                                                                                        |
| Markle-Reid <sup>31</sup> | I: 10%<br>(6/62)<br>C: 11%<br>(7/64)     | Not Reported                                         | <b>Hospital<br/>Admission</b><br>I: 16%(of 62)<br>C: 24% (of 64)               | Not Reported | CES-D<br><br>I: 8.61 (6.98)<br>C: 13.64<br>(12.04)<br>P=0.02                                     | SF-36<br><br>Split into<br>component<br>scales –<br>significant<br>improvement<br>in summary<br>scales in<br>intervention<br>group. |
| Markle-Reid <sup>32</sup> | Group data<br>not reported.              | Not Reported                                         | Not Reported                                                                   | Not Reported | CES-D<br>Difference in<br>mean change in<br>favour of I: 2.72<br>(0.39, 5.07), P<br>0.022        | SF-36<br><br>Split into<br>component<br>scales                                                                                      |
| Markle-Reid <sup>33</sup> | I: 8% (4/52)<br>C: 6% (3/49)             | Not Reported                                         | Not Reported                                                                   | Not Reported | CES-D<br><br>I: 11.40 (11.95)<br>C: 12.62 (10.9)<br><br>No difference                            | SF-36<br><br>Split into<br>component<br>scales                                                                                      |
| Parsons <sup>34</sup>     | I: 0% (0/108)<br>C: 4%<br>(4/97)         | Not Reported                                         | Not Reported                                                                   | Not Reported | Not Reported                                                                                     | SF-36<br>(overall)<br>Intergroup<br>difference in<br>change from<br>baseline P<br><0.0001 in<br>favour of<br>Intervention.          |
| Tinetti <sup>35</sup>     | I: 0.4%<br>(3/691)<br>C: 0.1%<br>(1/691) | <b>Home Mgmt</b><br><br>I: 9.5 (2.9)<br>C: 9.2 (3.0) | <b>No longer at<br/>home</b><br><br>I: 18%<br>(122/691)<br>C: 29%<br>(201/691) | Not reported | Not reported                                                                                     | Not reported                                                                                                                        |
| Zingmark <sup>36</sup>    | I: 9%<br>(5/55)<br>C: 9%<br>(3/32)       | Not Reported                                         | Nursing Home<br>I: 2%<br>(1/55)<br>C: 0% (0/32)                                | Not Reported | Not Reported                                                                                     | EQ5D<br>Graphically<br>displayed (no<br>data)                                                                                       |
| <b>Total (/13)</b>        | <b>11</b>                                | <b>6</b>                                             | <b>7</b>                                                                       | <b>0</b>     | <b>6</b>                                                                                         | <b>8</b>                                                                                                                            |

| Study                     | Health Economic                                                                                                                  | Caregiver Strain | On-going Homecare                                                                                                                   | Participant Satisfaction                                                     | Provider Satisfaction |
|---------------------------|----------------------------------------------------------------------------------------------------------------------------------|------------------|-------------------------------------------------------------------------------------------------------------------------------------|------------------------------------------------------------------------------|-----------------------|
| Feldman <sup>24</sup>     | \$2,900 annual cost saving per person in intervention group                                                                      | Not Reported     | Average of 6 less hours per week in intervention group.                                                                             | Participants at intervention site significantly less satisfied with service. | Not Reported          |
| Glendinning <sup>25</sup> | Re-ablement associated with significant decrease in subsequent social care costs.<br><br>High probability of cost effectiveness. | Not Reported     | Cost data, not hours or per participant.<br><br>Intervention participants used less social care services during follow-up period.   | Not Reported                                                                 | Not Reported          |
| Gottlieb <sup>26</sup>    | Not Reported                                                                                                                     | Not Reported     | Significantly greater increase in use of formal service in control group (change scores only – no data).                            | Not Reported                                                                 | Not Reported          |
| King <sup>27</sup>        | Not Reported                                                                                                                     | Not Reported     | Reduced Support<br><br>I: 29% (22/76)<br>C: 0% (0/81)                                                                               | Not Reported                                                                 | Not Reported          |
| Lewin <sup>28</sup>       | Not Reported                                                                                                                     | Not Reported     | Reduced/ Discontinued<br><br>3M<br>I: 66% (66/100)<br>C: 11% (11/100)<br><br>12M<br>I: 65% (65/100)<br>C: 26% (26/100)              | Not Reported                                                                 | Not Reported          |
| Lewin <sup>29</sup>       | Not Reported                                                                                                                     | Not Reported     | Needing on-going 'personal care'<br><br>3M<br>I: 28% (103/375)<br>C: 64% (238/375)<br><br>6M<br>I: 18% (67/375)<br>C: 40% (151/375) | Not Reported                                                                 | Not Reported          |
| Marek <sup>30</sup>       | Not Reported                                                                                                                     | Not Reported     | Not Reported                                                                                                                        | Not Reported                                                                 | Not Reported          |
| Markle-Reid <sup>31</sup> | Higher costs related to intervention; lower acute hospitalisation costs.                                                         | Not Reported     | Not Reported                                                                                                                        | Not Reported                                                                 | Not Reported          |

| <b>Study</b>                                                                                                                                                                                                                                                                                             | <b>Health Economic</b>                                                          | <b>Caregiver Strain</b> | <b>On-going Homecare</b>         | <b>Participant Satisfaction</b> | <b>Provider Satisfaction</b> |
|----------------------------------------------------------------------------------------------------------------------------------------------------------------------------------------------------------------------------------------------------------------------------------------------------------|---------------------------------------------------------------------------------|-------------------------|----------------------------------|---------------------------------|------------------------------|
| Markle-Reid <sup>32</sup>                                                                                                                                                                                                                                                                                | No differences in health and social services cost at 6months.                   | Not Reported            | Not Reported                     | Not Reported                    | Not Reported                 |
| Markle-Reid <sup>33</sup>                                                                                                                                                                                                                                                                                | Higher total per-person mean cost of health services in the intervention group. | Not Reported            | Not Reported                     | Not Reported                    | Not Reported                 |
| Parsons <sup>34</sup>                                                                                                                                                                                                                                                                                    | Not Reported                                                                    | Not Reported            | Not Reported                     | Not Reported                    | Not Reported                 |
| Tinetti <sup>35</sup>                                                                                                                                                                                                                                                                                    | Not Reported                                                                    | Not Reported            | Not Reported                     | Not Reported                    | Not Reported                 |
| Zingmark <sup>36</sup>                                                                                                                                                                                                                                                                                   | Not Reported                                                                    | Not Reported            | I: 30% (14/46)<br>C: 75% (21/28) | Not Reported                    | Not Reported                 |
| <b>Total (/13)</b>                                                                                                                                                                                                                                                                                       | <b>5</b>                                                                        | <b>0</b>                | <b>6</b>                         | <b>1</b>                        | <b>0</b>                     |
| <b>Key:</b><br>M = Months<br>I = Intervention<br>C = Control<br>Deaths and admissions data is cumulative where there is more than one time point.<br>Differences in data presentation reflects the different ways in which the data was reported (and what could be extracted) from the original papers. |                                                                                 |                         |                                  |                                 |                              |
